# Supplementary material for: Three methods for inoculation of viral vectors into plants
Source: Frontiers journal article supplement (doi:10.3389/fpls.2022.963756), 2022-08-30
Supplement: Data_Sheet_2.pdf [file Data_Sheet_2.pdf]

## Supporting Information for

### Three methods for inoculation of viral vectors into plants

**Andrea G. Monroy-Borrego<sup>1</sup>, Nicole F. Steinmetz<sup>1,2,3,4,5,6\*</sup>**

<sup>1</sup>Department of NanoEngineering, University of California San Diego, 9500 Gilman Dr., La Jolla, California 92039, United States

<sup>2</sup>Department of Bioengineering, University of California San Diego, 9500 Gilman Dr., La Jolla, California 92039, United States

<sup>3</sup>Department of Radiology, University of California San Diego, 9500 Gilman Dr., La Jolla, California 92039, United States

<sup>4</sup>Center for Nano-ImmunoEngineering, University of California San Diego, 9500 Gilman Dr., La Jolla, California 92039, United States

<sup>5</sup>Moore's Cancer Center, University of California San Diego, 9500 Gilman Dr., La Jolla, California 92039, United States

<sup>6</sup>Institute for Materials Discovery and Design, University of California San Diego, 9500 Gilman Dr., La Jolla, California 92039, United States

\*Email: [nsteinmetz@ucsd.edu](mailto:nsteinmetz@ucsd.edu)

**\* Correspondence:**

Nicole F. Steinmetz  
[nsteinmetz@ucsd.edu](mailto:nsteinmetz@ucsd.edu)

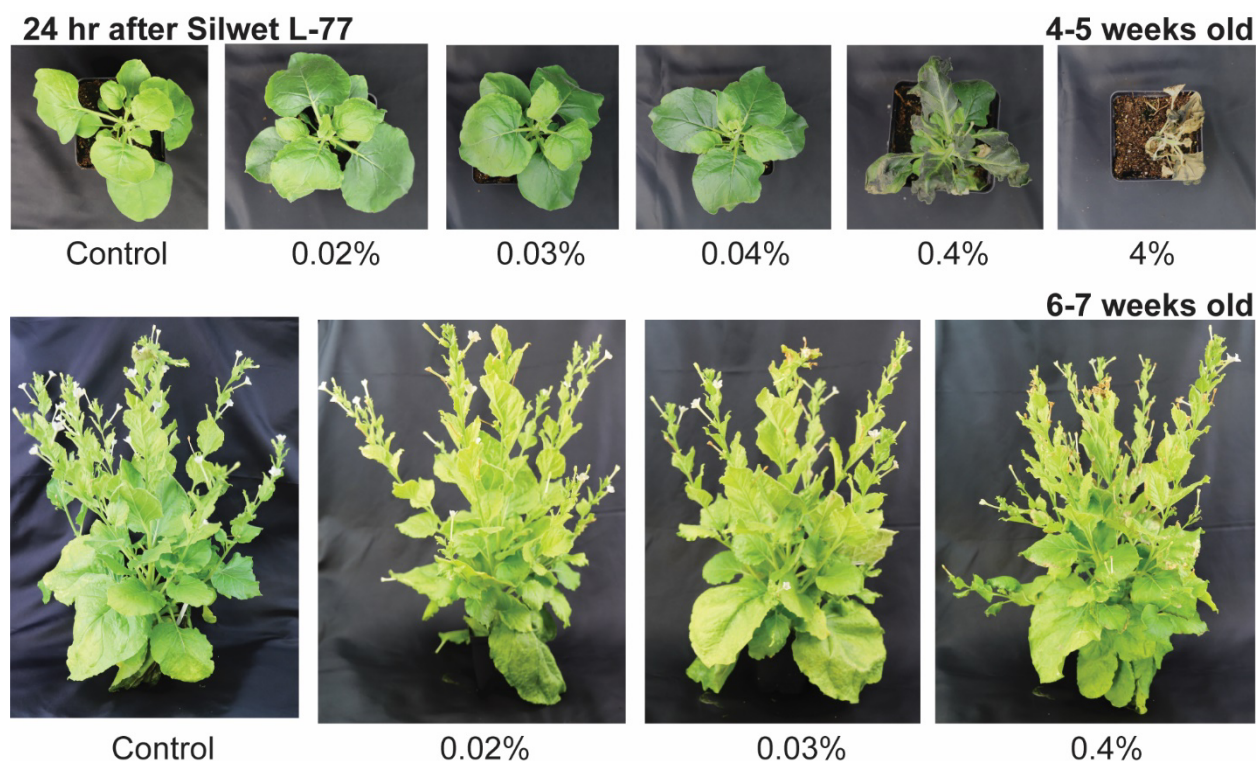

**Figure S1.** Photographic documentation of the effects of Silwet L-77 spray on *N. benthamiana* 24 hours post treatment. 4-5 weeks old plants tolerated concentrations below 0.04% Silwet L-77. Silwet L-77 treatment caused discoloration and darkening of the leaves which was prevalent at 0.4% Silwet L-77. Using 4% Silwet L-77 caused necrotic tissue. Older plants (6-7 weeks old) were more resistant to the effects of the surfactant, with almost no adverse effects observed for up to a 0.4% of Silwet L-77 (higher concentrations were not tested).

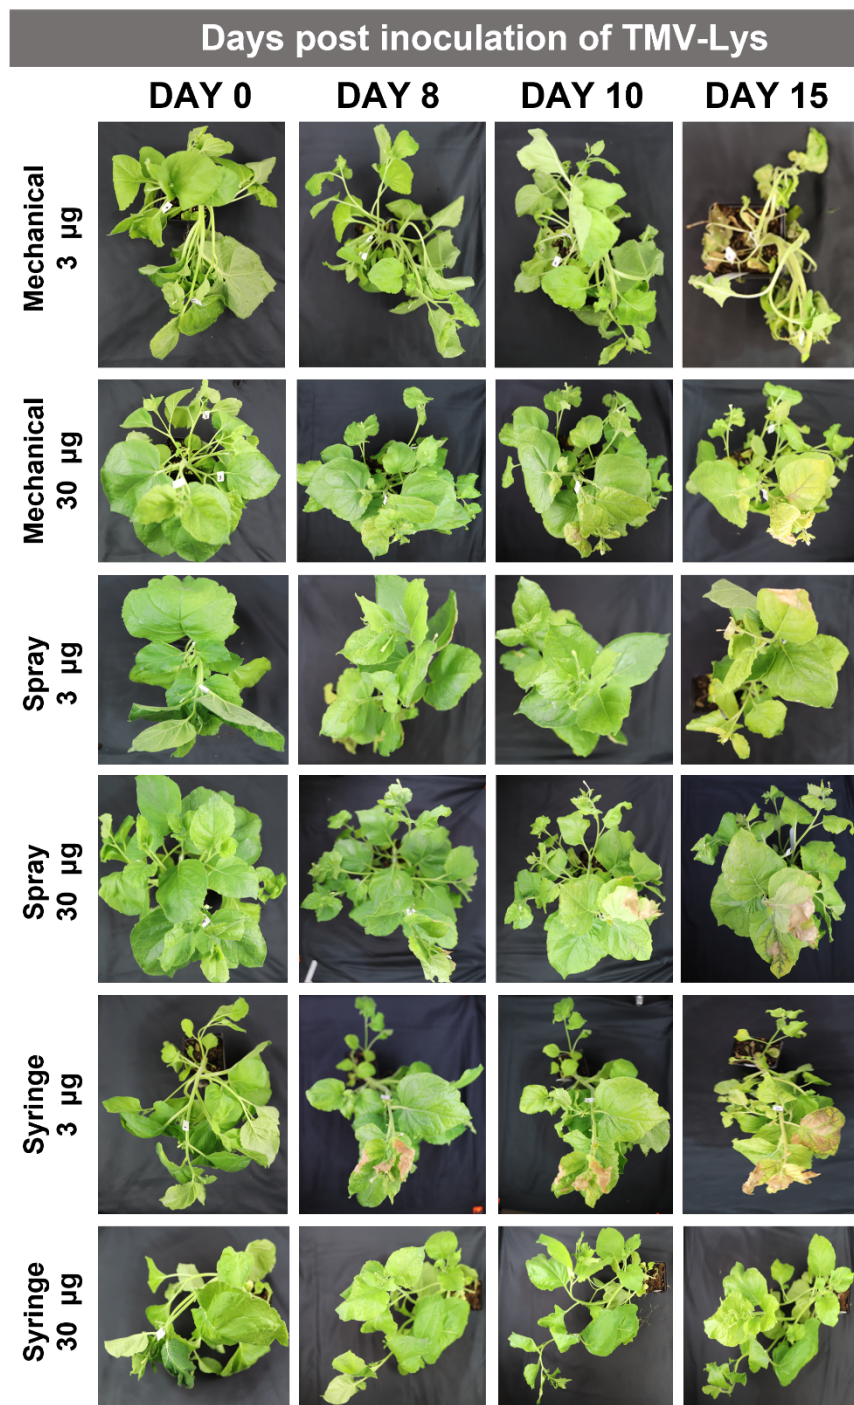

**Figure S2.** Photographs of *N. benthamiana* from day 0 to day 15 TMV-Lys days post inoculation (dpi) via mechanical [3, 30  $\mu$ g], spray [3, 30  $\mu$ g], and syringe [3, 30  $\mu$ g] inoculation using TMV-Lys. The experiments were done in duplicate and 10 plants were used per treatment.



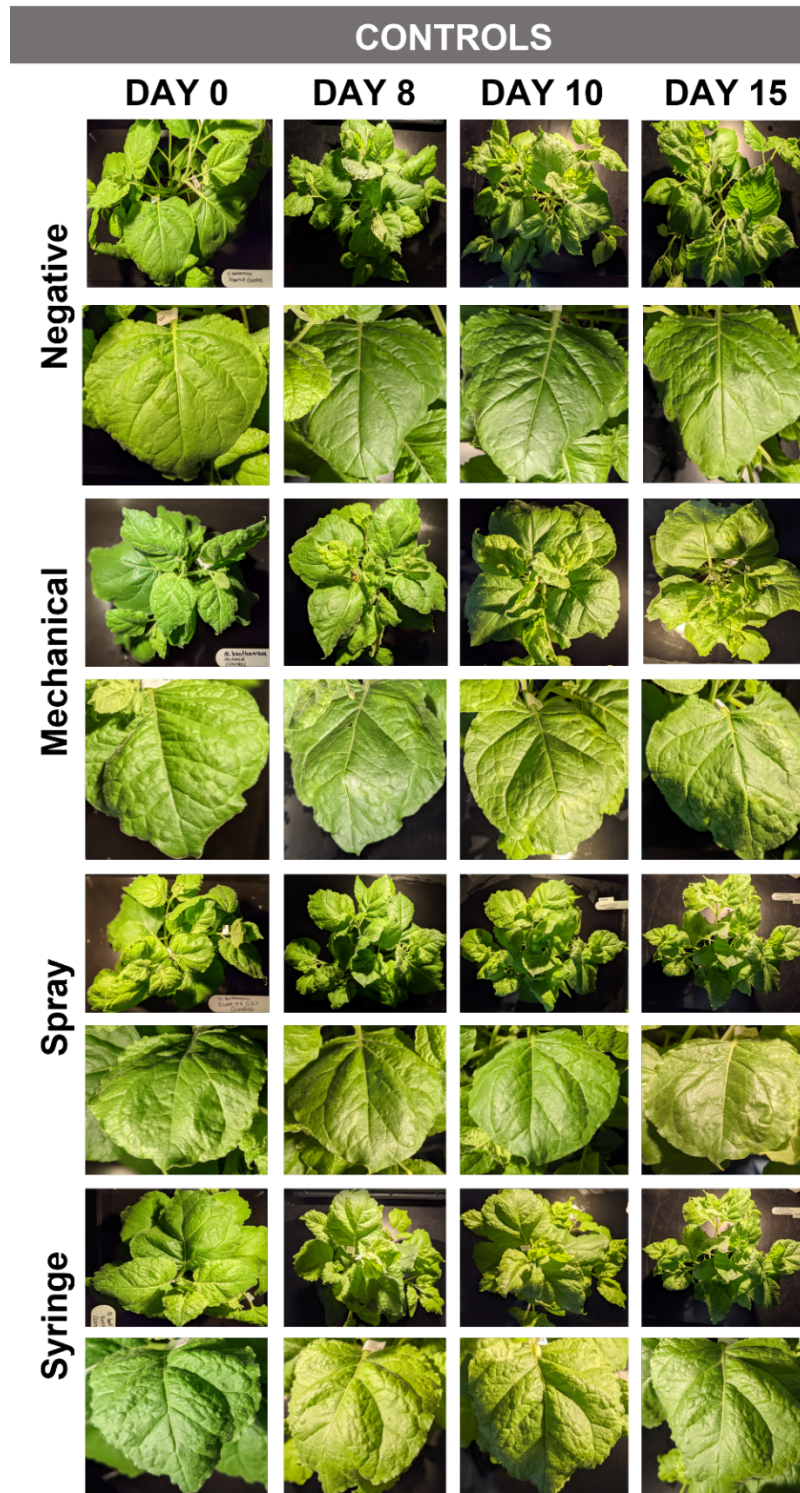

**Figure S3.** Representative photographs of *N. benthamiana* from day 0 to day 15 post inoculation – these are the negative controls: mechanical control are plants rubbed with carborundum, spray control is treated with 0.03% Silwet L-77, and the syringe control was injected with NaPB at the petiole and stem.



# **SDS-PAGE**

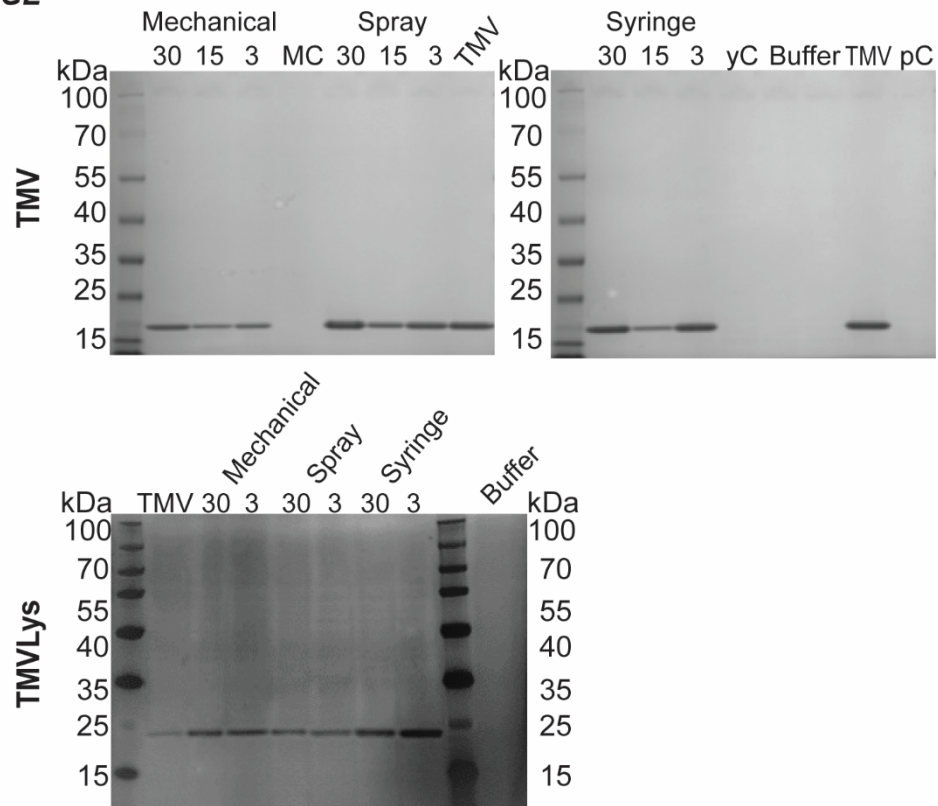

**Figure S4.** SDS-PAGE of the extracted TMV and TMV-Lys, the presence of its coat protein (17.5 kDa) was consistent in all samples.
